# Supplementary material for: Analysis of Protein Pathway Networks Using Hybrid Properties
Source: Molecules. 2010 Nov 12;15(11):8177–92. doi: 10.3390/molecules15118177 (PMC6259184; doi:10.3390/molecules15118177)
Supplement: Supplementary File 5 [file molecules-15-08177-s005.pdf]

## Online Supporting Information S5: Accuracy in IFS (incremental feature selection)

| Index | The last added feature                      | Accuracy of<br>positive<br>pathway | Accuracy of<br>negative<br>pathway | Total<br>accuracy |
|-------|---------------------------------------------|------------------------------------|------------------------------------|-------------------|
| 1     | out_local_density_0.6_mean                  | 100.00%                            | 0.00%                              | 0.99%             |
| 2     | polarity_composition_P_max                  | 42.60%                             | 95.88%                             | 95.35%            |
| 3     | in_local_density_0.7_max                    | 54.44%                             | 98.91%                             | 98.47%            |
| 4     | in_local_density_0.5_mean                   | 58.58%                             | 99.27%                             | 98.87%            |
| 5     | topological_change_0.6_0.7                  | 69.23%                             | 99.48%                             | 99.18%            |
| 6     | topological_change_0.1_0.2                  | 76.33%                             | 99.57%                             | 99.34%            |
| 7     | in_degree_variance                          | 73.37%                             | 99.59%                             | 99.33%            |
| 8     | topological_change_0.7_0.8                  | 75.74%                             | 99.62%                             | 99.38%            |
| 9     | out_local_density_0.8_mean                  | 73.96%                             | 99.62%                             | 99.37%            |
| 10    | secondary_structure_distribution_P-1.0_mean | 75.74%                             | 99.66%                             | 99.43%            |

|    |                                            |        |        |        |
|----|--------------------------------------------|--------|--------|--------|
| 11 | topological_change_0.2_0.3                 | 75.15% | 99.68% | 99.44% |
| 12 | in_local_density_0.6_mean                  | 74.56% | 99.65% | 99.40% |
| 13 | out_degree_variance                        | 75.15% | 99.63% | 99.39% |
| 14 | secondary_structure_distribution_P-1.0_max | 74.56% | 99.66% | 99.41% |
| 15 | out_local_density_0.5_mean                 | 75.74% | 99.65% | 99.41% |
| 16 | out_degree_correlation_max                 | 77.51% | 99.66% | 99.44% |
| 17 | out_local_density_0.7_max                  | 78.11% | 99.65% | 99.44% |
| 18 | polarizability_distribution_N-1.0_max      | 76.92% | 99.66% | 99.44% |
| 19 | in_local_density_0.7_mean                  | 78.11% | 99.67% | 99.46% |
| 20 | AA_composition_C_mean                      | 79.88% | 99.69% | 99.49% |
| 21 | in_degree_correlation_variance             | 79.88% | 99.69% | 99.49% |

|    |                                            |        |        |        |
|----|--------------------------------------------|--------|--------|--------|
| 22 | secondary_structure_distribution_P-0.0_max | 79.88% | 99.69% | 99.49% |
| 23 | out_local_density_0.7_mean                 | 77.51% | 99.66% | 99.44% |
| 24 | AA_composition_S_mean                      | 77.51% | 99.70% | 99.48% |
| 25 | out_degree_correlation_variance            | 77.51% | 99.70% | 99.48% |
| 26 | VanDerWaal_distribution_P-1.0_max          | 77.51% | 99.70% | 99.48% |
| 27 | polarity_distribution_P-1.0_max            | 77.51% | 99.71% | 99.49% |
| 28 | in_local_density_0.8_mean                  | 74.56% | 99.67% | 99.42% |
| 29 | AA_composition_K_mean                      | 73.96% | 99.66% | 99.41% |
| 30 | polarity_distribution_H-1.0_max            | 73.96% | 99.67% | 99.42% |
| 31 | polarizability_transition_P_H_mean         | 74.56% | 99.68% | 99.43% |
| 32 | in_clustering_max                          | 76.33% | 99.63% | 99.40% |

|    |                                                   |        |        |        |
|----|---------------------------------------------------|--------|--------|--------|
| 33 | hydrophobicity_distribution<br>_N-1.0_max         | 76.33% | 99.66% | 99.43% |
| 34 | solvent_accessibility_compo<br>sition_H_max       | 76.33% | 99.68% | 99.45% |
| 35 | out_local_density_0.9_mean                        | 76.92% | 99.63% | 99.40% |
| 36 | VanDerWaal_distribution_N-1<br>.0_max             | 76.92% | 99.65% | 99.42% |
| 37 | secondary_structure_transit<br>ion_PH_mean        | 74.56% | 99.67% | 99.42% |
| 38 | in_local_density_0.3_mean                         | 77.51% | 99.67% | 99.46% |
| 39 | hydrophobicity_distribution<br>_H-1.0_max         | 76.92% | 99.69% | 99.46% |
| 40 | in_local_density_0.9_mean                         | 77.51% | 99.66% | 99.44% |
| 41 | out_local_density_0_max                           | 77.51% | 99.64% | 99.42% |
| 42 | solvent_accessibility_distr<br>ibution_H-1.0_mean | 76.92% | 99.61% | 99.38% |

|    |                                                   |        |        |        |
|----|---------------------------------------------------|--------|--------|--------|
| 43 | in_local_density_0.6_max                          | 76.33% | 99.64% | 99.41% |
| 44 | AA_composition_V_mean                             | 76.33% | 99.61% | 99.38% |
| 45 | VanDerWaal_distribution_H-1<br>.0_max             | 76.33% | 99.63% | 99.40% |
| 46 | polarizability_distribution<br>_P-1.0_max         | 75.74% | 99.67% | 99.43% |
| 47 | out_local_density_0.6_max                         | 75.15% | 99.66% | 99.41% |
| 48 | hydrophobicity_distribution<br>_P-1.0_max         | 75.15% | 99.66% | 99.42% |
| 49 | solvent_accessibility_distr<br>ibution_H-0.5_mean | 75.74% | 99.66% | 99.43% |
| 50 | secondary_structure_distrib<br>ution_H-0.0_mean   | 75.74% | 99.64% | 99.40% |
| 51 | in_local_density_0_max                            | 75.15% | 99.64% | 99.40% |
| 52 | solvent_accessibility_compo<br>sition_H_mean      | 74.56% | 99.65% | 99.40% |

|    |                                       |        |        |        |
|----|---------------------------------------|--------|--------|--------|
| 53 | out_degree_correlation_mean           | 75.15% | 99.67% | 99.43% |
| 54 | out_out_topological_varianc<br>e      | 75.74% | 99.64% | 99.40% |
| 55 | AA_composition_W_mean                 | 73.37% | 99.60% | 99.34% |
| 56 | out_local_density_0.8_max             | 71.60% | 99.60% | 99.33% |
| 57 | out_local_density_0.1_max             | 71.60% | 99.60% | 99.33% |
| 58 | hydrophobicity_transition_P<br>H_mean | 71.60% | 99.63% | 99.35% |
| 59 | polarity_distribution_N-1.0<br>_max   | 71.60% | 99.63% | 99.35% |
| 60 | in_local_density_0.8_max              | 71.60% | 99.62% | 99.34% |
| 61 | VanDerWaal_transition_PN_me<br>an     | 72.19% | 99.60% | 99.33% |
| 62 | out_clustering_max                    | 72.78% | 99.62% | 99.36% |
| 63 | AA_composition_L_mean                 | 72.78% | 99.61% | 99.34% |
| 64 | in_local_density_0.1_max              | 72.78% | 99.60% | 99.33% |

|    |                                              |        |        |        |
|----|----------------------------------------------|--------|--------|--------|
| 65 | secondary_structure_distribution_P-0.0_mean  | 72.78% | 99.60% | 99.33% |
| 66 | out_local_density_0.3_mean                   | 71.60% | 99.60% | 99.32% |
| 67 | AA_composition_A_mean                        | 71.01% | 99.62% | 99.33% |
| 68 | AA_composition_H_mean                        | 71.60% | 99.57% | 99.29% |
| 69 | polarizability_distribution_H-1.0_max        | 71.60% | 99.57% | 99.29% |
| 70 | VanDerWaal_distribution_H-0.5_mean           | 72.19% | 99.57% | 99.30% |
| 71 | in_in_topological_variance                   | 71.01% | 99.57% | 99.29% |
| 72 | AA_composition_G_mean                        | 71.60% | 99.56% | 99.28% |
| 73 | secondary_structure_distribution_P-0.75_mean | 71.01% | 99.54% | 99.26% |
| 74 | in_degree_correlation_mean                   | 71.01% | 99.55% | 99.27% |

|    |                                              |        |        |        |
|----|----------------------------------------------|--------|--------|--------|
| 75 | secondary_structure_distribution_N-1.0_max   | 71.01% | 99.54% | 99.26% |
| 76 | AA_composition_T_mean                        | 72.19% | 99.52% | 99.25% |
| 77 | polarity_distribution_H-1.0_mean             | 71.01% | 99.50% | 99.22% |
| 78 | out_local_density_0.9_max                    | 70.41% | 99.51% | 99.22% |
| 79 | secondary_structure_distribution_N-0.5_mean  | 70.41% | 99.49% | 99.20% |
| 80 | in_local_density_0.9_max                     | 70.41% | 99.48% | 99.19% |
| 81 | in_local_density_0.4_mean                    | 72.19% | 99.50% | 99.23% |
| 82 | secondary_structure_distribution_H-1.0_mean  | 72.19% | 99.48% | 99.21% |
| 83 | polarizability_distribution_N-0.75_mean      | 71.60% | 99.47% | 99.19% |
| 84 | solvent_accessibility_distribution_H-0.0_max | 70.41% | 99.49% | 99.20% |

|    |                                                |        |        |        |
|----|------------------------------------------------|--------|--------|--------|
| 85 | solvent_accessibility_distribution_H-0.25_mean | 72.19% | 99.48% | 99.21% |
| 86 | AA_composition_D_mean                          | 71.60% | 99.46% | 99.18% |
| 87 | out_local_density_0.2_max                      | 71.60% | 99.46% | 99.19% |
| 88 | polarizability_distribution_H-1.0_mean         | 71.01% | 99.45% | 99.17% |
| 89 | polarizability_distribution_P-1.0_mean         | 69.82% | 99.44% | 99.14% |
| 90 | in_degree_max                                  | 69.82% | 99.45% | 99.16% |
| 91 | weight_edge_mean(with_missing_edge)            | 70.41% | 99.46% | 99.17% |
| 92 | hydrophobicity_distribution_P-0.0_mean         | 70.41% | 99.45% | 99.16% |
| 93 | secondary_structure_transition_PN_mean         | 70.41% | 99.44% | 99.15% |
| 94 | out_clustering_mean                            | 69.82% | 99.44% | 99.15% |

|     |                                                |        |        |        |
|-----|------------------------------------------------|--------|--------|--------|
| 95  | polarizability_distribution_N-0.25_mean        | 71.01% | 99.43% | 99.15% |
| 96  | secondary_structure_distribution_H-0.5_mean    | 69.82% | 99.43% | 99.14% |
| 97  | AA_composition_Q_mean                          | 69.23% | 99.42% | 99.12% |
| 98  | solvent_accessibility_distribution_H-0.75_mean | 68.64% | 99.40% | 99.09% |
| 99  | AA_composition_P_mean                          | 69.23% | 99.40% | 99.10% |
| 100 | secondary_structure_distribution_P-0.25_mean   | 68.64% | 99.41% | 99.10% |
| 101 | hydrophobicity_composition_H_max               | 70.41% | 99.43% | 99.14% |
| 102 | polarity_distribution_H-0.25_mean              | 71.01% | 99.41% | 99.13% |
| 103 | AA_composition_N_mean                          | 71.01% | 99.41% | 99.13% |

|     |                                             |        |        |        |
|-----|---------------------------------------------|--------|--------|--------|
| 104 | hydrophobicity_distribution<br>_N-0.0_mean  | 69.82% | 99.39% | 99.10% |
| 105 | in_local_density_0.2_max                    | 69.82% | 99.38% | 99.09% |
| 106 | AA_composition_R_mean                       | 69.23% | 99.37% | 99.07% |
| 107 | out_local_density_0.4_mean                  | 70.41% | 99.40% | 99.11% |
| 108 | VanDerWaal_distribution_P-0<br>.75_mean     | 69.82% | 99.39% | 99.10% |
| 109 | out_degree_max                              | 69.23% | 99.41% | 99.12% |
| 110 | polarizability_distribution<br>_N-1.0_mean  | 69.82% | 99.38% | 99.09% |
| 111 | polarizability_distribution<br>_H-0.25_mean | 69.82% | 99.37% | 99.07% |
| 112 | hydrophobicity_distribution<br>_N-1.0_mean  | 69.23% | 99.36% | 99.06% |
| 113 | VanDerWaal_transition_PH_me<br>an           | 69.23% | 99.36% | 99.06% |
| 114 | polarity_distribution_H-0.7<br>5_mean       | 69.23% | 99.39% | 99.09% |

|     |                                                  |        |        |        |
|-----|--------------------------------------------------|--------|--------|--------|
| 115 | in_clustering_mean                               | 69.82% | 99.40% | 99.10% |
| 116 | polarity_distribution_P-1.0<br>_mean             | 70.41% | 99.37% | 99.08% |
| 117 | secondary_structure_transit<br>ion_NH_mean       | 70.41% | 99.37% | 99.08% |
| 118 | secondary_structure_distrib<br>ution_H-0.25_mean | 71.01% | 99.39% | 99.11% |
| 119 | AA_composition_Y_mean                            | 71.60% | 99.37% | 99.10% |
| 120 | polarizability_distribution<br>_P-0.25_mean      | 71.01% | 99.37% | 99.09% |
| 121 | in_degree_correlation_max                        | 70.41% | 99.38% | 99.09% |
| 122 | polarizability_composition_<br>N_mean            | 70.41% | 99.35% | 99.06% |
| 123 | VanDerWaal_distribution_H-0<br>.75_mean          | 70.41% | 99.35% | 99.06% |

|     |                                               |        |        |        |
|-----|-----------------------------------------------|--------|--------|--------|
| 124 | solvent_accessibility_distribution_H-0.0_mean | 71.01% | 99.33% | 99.05% |
| 125 | VanDerWaal_distribution_N-0.5_mean            | 71.01% | 99.35% | 99.07% |
| 126 | polarizability_transition_P_N_mean            | 71.01% | 99.34% | 99.06% |
| 127 | secondary_structure_distribution_N-0.25_mean  | 71.01% | 99.34% | 99.06% |
| 128 | AA_composition_E_mean                         | 71.01% | 99.33% | 99.05% |
| 129 | out_local_density_0.3_max                     | 71.01% | 99.33% | 99.05% |
| 130 | VanDerWaal_distribution_P-1.0_mean            | 71.01% | 99.33% | 99.05% |
| 131 | hydrophobicity_distribution_P-1.0_mean        | 71.01% | 99.33% | 99.05% |
| 132 | hydrophobicity_distribution_H-0.75_mean       | 71.60% | 99.31% | 99.04% |

|     |                                              |        |        |        |
|-----|----------------------------------------------|--------|--------|--------|
| 133 | secondary_structure_composition_P_mean       | 70.41% | 99.30% | 99.01% |
| 134 | secondary_structure_distribution_N-0.75_mean | 70.41% | 99.29% | 99.00% |
| 135 | AA_composition_G_max                         | 70.41% | 99.29% | 99.00% |
| 136 | secondary_structure_distribution_H-0.75_mean | 70.41% | 99.30% | 99.02% |
| 137 | in_local_density_0.3_max                     | 70.41% | 99.30% | 99.01% |
| 138 | AA_composition_F_mean                        | 69.23% | 99.29% | 98.99% |
| 139 | VanDerWaal_distribution_N-1.0_mean           | 69.82% | 99.29% | 99.00% |
| 140 | polarity_transition_PH_mean                  | 69.82% | 99.28% | 98.99% |
| 141 | hydrophobicity_distribution_H-0.25_mean      | 69.82% | 99.27% | 98.98% |

|     |                                             |        |        |        |
|-----|---------------------------------------------|--------|--------|--------|
| 142 | secondary_structure_distribution_N-0.0_mean | 69.82% | 99.26% | 98.97% |
| 143 | graph_size                                  | 69.82% | 99.27% | 98.97% |
| 144 | weight_edge_mean(without_missing_edge)      | 70.41% | 99.29% | 99.00% |
| 145 | polarizability_distribution_P-0.0_mean      | 69.82% | 99.28% | 98.99% |
| 146 | secondary_structure_distribution_P-0.5_mean | 69.23% | 99.30% | 99.00% |
| 147 | secondary_structure_distribution_H-1.0_max  | 69.23% | 99.30% | 99.00% |
| 148 | polarity_distribution_H-0.5_mean            | 69.23% | 99.29% | 98.99% |
| 149 | polarizability_distribution_N-0.0_mean      | 68.64% | 99.27% | 98.96% |
| 150 | polarizability_distribution_N-0.5_mean      | 69.23% | 99.25% | 98.95% |
| 151 | topological_change_0.3_0.4                  | 68.64% | 99.23% | 98.93% |

|     |                                              |        |        |        |
|-----|----------------------------------------------|--------|--------|--------|
| 152 | secondary_structure_composition_N_mean       | 69.23% | 99.23% | 98.93% |
| 153 | polarizability_transition_N_H_mean           | 69.23% | 99.22% | 98.92% |
| 154 | solvent_accessibility_distribution_H-1.0_max | 69.82% | 99.19% | 98.90% |
| 155 | polarity_distribution_N-1.0_mean             | 69.82% | 99.18% | 98.89% |
| 156 | solvent_accessibility_transition_HE_mean     | 69.82% | 99.18% | 98.89% |
| 157 | polarizability_distribution_P-0.5_mean       | 69.82% | 99.17% | 98.88% |
| 158 | hydrophobicity_distribution_H-1.0_mean       | 69.82% | 99.17% | 98.88% |
| 159 | polarity_distribution_H-0.0_mean             | 69.82% | 99.18% | 98.89% |
| 160 | secondary_structure_distribution_N-1.0_mean  | 69.23% | 99.17% | 98.87% |

|     |                                             |        |        |        |
|-----|---------------------------------------------|--------|--------|--------|
| 161 | hydrophobicity_distribution<br>_N-0.75_mean | 69.23% | 99.15% | 98.85% |
| 162 | out_in_topological_mean                     | 69.23% | 99.15% | 98.86% |
| 163 | AA_composition_I_mean                       | 69.23% | 99.14% | 98.85% |
| 164 | VanDerWaal_distribution_H-1<br>.0_mean      | 69.23% | 99.14% | 98.85% |
| 165 | hydrophobicity_distribution<br>_P-0.25_mean | 69.82% | 99.14% | 98.85% |
| 166 | AA_composition_M_mean                       | 69.82% | 99.13% | 98.84% |
| 167 | VanDerWaal_distribution_N-0<br>.75_mean     | 69.82% | 99.11% | 98.82% |
| 168 | hydrophobicity_transition_P<br>N_mean       | 69.82% | 99.12% | 98.83% |
| 169 | in_clustering_variance                      | 69.23% | 99.14% | 98.85% |
| 170 | polarity_distribution_N-0.2<br>5_mean       | 68.05% | 99.15% | 98.84% |

|     |                                             |        |        |        |
|-----|---------------------------------------------|--------|--------|--------|
| 171 | polarizability_composition_<br>H_mean       | 68.05% | 99.14% | 98.83% |
| 172 | VanDerWaal_composition_N_me<br>an           | 67.46% | 99.14% | 98.82% |
| 173 | hydrophobicity_transition_N<br>H_max        | 67.46% | 99.18% | 98.86% |
| 174 | AA_composition_Q_max                        | 68.05% | 99.18% | 98.88% |
| 175 | VanDerWaal_distribution_P-0<br>.0_mean      | 68.05% | 99.17% | 98.86% |
| 176 | out_clustering_variance                     | 67.46% | 99.18% | 98.86% |
| 177 | polarity_distribution_P-0.5<br>_mean        | 67.46% | 99.16% | 98.85% |
| 178 | VanDerWaal_distribution_N-0<br>.0_mean      | 67.46% | 99.17% | 98.86% |
| 179 | VanDerWaal_distribution_H-0<br>.25_mean     | 67.46% | 99.16% | 98.85% |
| 180 | hydrophobicity_distribution<br>_P-0.75_mean | 68.05% | 99.16% | 98.85% |

|     |                                                |        |        |        |
|-----|------------------------------------------------|--------|--------|--------|
| 181 | VanDerWaal_distribution_N-0<br>.25_mean        | 68.05% | 99.17% | 98.86% |
| 182 | polarizability_distribution<br>_P-0.75_mean    | 68.05% | 99.17% | 98.86% |
| 183 | secondary_structure_distrib<br>ution_H-0.0_max | 68.05% | 99.18% | 98.87% |
| 184 | polarizability_distribution<br>_H-0.75_mean    | 67.46% | 99.17% | 98.86% |
| 185 | hydrophobicity_distribution<br>_P-0.0_max      | 67.46% | 99.16% | 98.85% |
| 186 | polarizability_composition_<br>P_mean          | 68.05% | 99.17% | 98.86% |
| 187 | in_out_topological_variance                    | 68.05% | 99.15% | 98.84% |
| 188 | secondary_structure_composi<br>tion_H_max      | 67.46% | 99.14% | 98.83% |
| 189 | polarity_transition_PN_mean                    | 67.46% | 99.14% | 98.82% |

|     |                                                 |        |        |        |
|-----|-------------------------------------------------|--------|--------|--------|
| 190 | in_local_density_0.4_max                        | 67.46% | 99.14% | 98.83% |
| 191 | polarity_distribution_P-0.2<br>5_mean           | 67.46% | 99.13% | 98.82% |
| 192 | polarizability_distribution<br>_H-0.5_mean      | 68.05% | 99.12% | 98.82% |
| 193 | secondary_structure_distrib<br>ution_N-0.75_max | 67.46% | 99.15% | 98.84% |
| 194 | in_in_topological_mean                          | 67.46% | 99.17% | 98.85% |
| 195 | hydrophobicity_distribution<br>_N-0.5_mean      | 67.46% | 99.15% | 98.84% |
| 196 | polarity_distribution_N-0.0<br>_mean            | 66.86% | 99.14% | 98.82% |
| 197 | VanDerWaal_transition_NH_me<br>an               | 66.86% | 99.14% | 98.82% |
| 198 | out_local_density_0.4_max                       | 66.86% | 99.14% | 98.82% |
| 199 | polarity_distribution_P-0.7<br>5_mean           | 66.86% | 99.15% | 98.83% |
| 200 | in_out_topological_mean                         | 66.27% | 99.14% | 98.81% |

|     |                                            |        |        |        |
|-----|--------------------------------------------|--------|--------|--------|
| 201 | hydrophobicity_composition_<br>P_mean      | 66.27% | 99.14% | 98.81% |
| 202 | out_in_topological_variance                | 66.27% | 99.15% | 98.82% |
| 203 | AA_composition_L_max                       | 66.27% | 99.14% | 98.82% |
| 204 | hydrophobicity_distribution_<br>P-0.5_mean | 66.27% | 99.14% | 98.82% |
| 205 | hydrophobicity_composition_<br>N_mean      | 66.27% | 99.14% | 98.81% |
| 206 | polarity_distribution_N-0.7<br>5_mean      | 66.27% | 99.13% | 98.80% |
| 207 | AA_composition_I_max                       | 66.27% | 99.14% | 98.81% |
| 208 | secondary_structure_composi<br>tion_H_mean | 66.27% | 99.13% | 98.80% |
| 209 | VanDerWaal_distribution_P-0<br>.25_mean    | 66.27% | 99.14% | 98.82% |
| 210 | out_out_topological_mean                   | 66.27% | 99.15% | 98.82% |
| 211 | polarity_transition_PN_max                 | 66.27% | 99.15% | 98.82% |

|     |                                            |        |        |        |
|-----|--------------------------------------------|--------|--------|--------|
| 212 | VanDerWaal_composition_H_mean              | 66.27% | 99.15% | 98.82% |
| 213 | hydrophobicity_distribution_H-0.5_mean     | 66.27% | 99.14% | 98.82% |
| 214 | out_local_density_0.2_mean                 | 66.27% | 99.15% | 98.82% |
| 215 | polarity_transition_NH_mean                | 66.27% | 99.15% | 98.82% |
| 216 | secondary_structure_composition_N_max      | 66.27% | 99.14% | 98.81% |
| 217 | secondary_structure_distribution_N-0.5_max | 65.68% | 99.14% | 98.80% |
| 218 | hydrophobicity_distribution_H-0.0_mean     | 65.68% | 99.14% | 98.80% |
| 219 | AA_composition_H_max                       | 65.68% | 99.14% | 98.81% |
| 220 | VanDerWaal_distribution_P-0.5_mean         | 65.68% | 99.12% | 98.79% |
| 221 | hydrophobicity_distribution_N-0.25_mean    | 65.09% | 99.12% | 98.78% |

|     |                                                  |        |        |        |
|-----|--------------------------------------------------|--------|--------|--------|
| 222 | AA_composition_R_max                             | 65.09% | 99.11% | 98.78% |
| 223 | first_singular_values                            | 65.09% | 99.12% | 98.78% |
| 224 | AA_composition_W_max                             | 65.09% | 99.11% | 98.78% |
| 225 | hydrophobicity_transition_N<br>H_mean            | 65.09% | 99.12% | 98.79% |
| 226 | polarity_transition_NH_max                       | 65.09% | 99.11% | 98.77% |
| 227 | secondary_structure_distrib<br>ution_H-0.75_max  | 65.09% | 99.12% | 98.79% |
| 228 | polarity_composition_N_mean                      | 65.09% | 99.12% | 98.79% |
| 229 | in_local_density_0.2_mean                        | 65.09% | 99.13% | 98.79% |
| 230 | VanDerWaal_distribution_N-0<br>.0_max            | 65.09% | 99.14% | 98.80% |
| 231 | solvent_accessibility_distr<br>ibution_H-0.5_max | 65.09% | 99.12% | 98.78% |
| 232 | secondary_structure_transit<br>ion_PH_max        | 65.68% | 99.11% | 98.78% |

|     |                                            |        |        |        |
|-----|--------------------------------------------|--------|--------|--------|
| 233 | polarity_composition_H_mean                | 65.68% | 99.12% | 98.79% |
| 234 | polarity_distribution_N-0.5<br>_mean       | 65.68% | 99.12% | 98.79% |
| 235 | hydrophobicity_distribution<br>_P-0.75_max | 65.68% | 99.14% | 98.80% |
| 236 | AA_composition_S_max                       | 65.68% | 99.13% | 98.80% |
| 237 | AA_composition_E_max                       | 65.68% | 99.12% | 98.79% |
| 238 | VanDerWaal_distribution_P-0<br>.25_max     | 65.68% | 99.13% | 98.80% |
| 239 | polarizability_distribution<br>_N-0.75_max | 65.68% | 99.12% | 98.79% |
| 240 | AA_composition_C_max                       | 65.68% | 99.09% | 98.76% |
| 241 | AA_composition_Y_max                       | 65.68% | 99.09% | 98.76% |
| 242 | AA_composition_T_max                       | 65.68% | 99.10% | 98.77% |
| 243 | VanDerWaal_distribution_H-0<br>.0_mean     | 65.68% | 99.10% | 98.77% |
| 244 | in_degree_median                           | 65.68% | 99.10% | 98.77% |
| 245 | AA_composition_D_max                       | 65.68% | 99.10% | 98.77% |

|     |                                               |        |        |        |
|-----|-----------------------------------------------|--------|--------|--------|
| 246 | solvent_accessibility_distribution_H-0.75_max | 65.68% | 99.09% | 98.76% |
| 247 | VanDerWaal_composition_N_max                  | 65.68% | 99.08% | 98.75% |
| 248 | hydrophobicity_composition_H_mean             | 66.27% | 99.08% | 98.76% |
| 249 | polarizability_composition_H_max              | 65.68% | 99.09% | 98.76% |
| 250 | VanDerWaal_composition_P_mean                 | 65.68% | 99.08% | 98.75% |
| 251 | secondary_structure_transition_PN_max         | 66.27% | 99.06% | 98.73% |
| 252 | VanDerWaal_distribution_H-0.25_max            | 66.27% | 99.05% | 98.72% |
| 253 | AA_composition_K_max                          | 66.27% | 99.05% | 98.72% |
| 254 | VanDerWaal_distribution_P-0.0_max             | 66.27% | 99.05% | 98.73% |
| 255 | AA_composition_F_max                          | 66.27% | 99.05% | 98.72% |

|     |                                                |        |        |        |
|-----|------------------------------------------------|--------|--------|--------|
| 256 | polarizability_distribution<br>_P-0.5_max      | 66.27% | 99.04% | 98.72% |
| 257 | polarizability_distribution<br>_N-0.25_max     | 66.27% | 99.04% | 98.72% |
| 258 | AA_composition_N_max                           | 66.27% | 99.04% | 98.72% |
| 259 | out_degree_median                              | 66.27% | 99.04% | 98.72% |
| 260 | polarizability_distribution<br>_N-0.0_max      | 66.27% | 99.04% | 98.71% |
| 261 | secondary_structure_distrib<br>ution_H-0.5_max | 66.27% | 99.04% | 98.71% |
| 262 | AA_composition_A_max                           | 66.27% | 99.03% | 98.71% |
| 263 | polarizability_distribution<br>_P-0.75_max     | 65.68% | 99.04% | 98.71% |
| 264 | polarity_composition_P_mean                    | 65.68% | 99.04% | 98.71% |
| 265 | polarizability_distribution<br>_H-0.0_mean     | 65.68% | 99.04% | 98.71% |
| 266 | polarizability_composition_<br>N_max           | 65.68% | 99.04% | 98.71% |

|     |                                                 |        |        |        |
|-----|-------------------------------------------------|--------|--------|--------|
| 267 | polarity_distribution_N-0.2<br>5_max            | 65.68% | 99.04% | 98.71% |
| 268 | VanDerWaal_transition_PH_ma<br>x                | 65.68% | 99.04% | 98.71% |
| 269 | VanDerWaal_distribution_H-0<br>.5_max           | 65.68% | 99.04% | 98.71% |
| 270 | AA_composition_V_max                            | 65.68% | 99.03% | 98.70% |
| 271 | polarizability_transition_N<br>H_max            | 65.68% | 99.03% | 98.70% |
| 272 | polarity_distribution_H-0.7<br>5_max            | 65.68% | 99.04% | 98.71% |
| 273 | polarity_distribution_P-0.7<br>5_max            | 65.68% | 99.04% | 98.71% |
| 274 | secondary_structure_distrib<br>ution_P-0.25_max | 65.68% | 99.03% | 98.70% |
| 275 | VanDerWaal_distribution_N-0<br>.5_max           | 65.68% | 99.02% | 98.69% |
| 276 | hydrophobicity_distribution<br>_N-0.5_max       | 65.68% | 99.02% | 98.69% |
| 277 | out_degree_mean                                 | 65.68% | 99.02% | 98.69% |

|     |                                               |        |        |        |
|-----|-----------------------------------------------|--------|--------|--------|
| 278 | polarizability_transition_P<br>H_max          | 65.68% | 99.01% | 98.68% |
| 279 | solvent_accessibility_distribution_H-0.25_max | 65.68% | 99.01% | 98.68% |
| 280 | solvent_accessibility_transition_HE_max       | 65.68% | 99.01% | 98.68% |
| 281 | VanDerWaal_distribution_P-0.75_max            | 65.68% | 99.01% | 98.68% |
| 282 | AA_composition_M_max                          | 65.68% | 99.01% | 98.68% |
| 283 | polarity_distribution_P-0.0_mean              | 65.68% | 99.01% | 98.68% |
| 284 | hydrophobicity_distribution_P-0.5_max         | 65.68% | 99.00% | 98.67% |
| 285 | VanDerWaal_transition_NH_max                  | 65.09% | 99.00% | 98.66% |
| 286 | out_local_density_0.1_mean                    | 65.09% | 98.99% | 98.66% |
| 287 | VanDerWaal_transition_PN_max                  | 65.68% | 99.00% | 98.67% |

|     |                                           |        |        |        |
|-----|-------------------------------------------|--------|--------|--------|
| 288 | hydrophobicity_distribution<br>_H-0.5_max | 65.68% | 99.00% | 98.67% |
| 289 | secondary_structure_transit<br>ion_NH_max | 65.68% | 99.01% | 98.68% |
| 290 | polarizability_distribution<br>_N-0.5_max | 65.68% | 99.00% | 98.67% |
| 291 | hydrophobicity_composition_<br>P_max      | 65.68% | 98.99% | 98.66% |
| 292 | VanDerWaal_distribution_H-0<br>.75_max    | 65.68% | 98.98% | 98.65% |
| 293 | hydrophobicity_transition_P<br>N_max      | 65.68% | 98.99% | 98.66% |
| 294 | polarizability_distribution<br>_P-0.0_max | 65.68% | 98.99% | 98.66% |
| 295 | VanDerWaal_distribution_N-0<br>.25_max    | 65.68% | 98.99% | 98.66% |
| 296 | polarity_transition_PH_max                | 65.68% | 98.98% | 98.65% |
| 297 | VanDerWaal_distribution_P-0<br>.5_max     | 65.68% | 98.98% | 98.65% |

|     |                                                 |        |        |        |
|-----|-------------------------------------------------|--------|--------|--------|
| 298 | in_local_density_0.1_mean                       | 65.68% | 98.98% | 98.65% |
| 299 | hydrophobicity_distribution<br>_N-0.25_max      | 65.09% | 98.96% | 98.63% |
| 300 | secondary_structure_distrib<br>ution_N-0.25_max | 65.09% | 98.96% | 98.62% |
| 301 | secondary_structure_composi<br>tion_P_max       | 65.09% | 98.96% | 98.63% |
| 302 | hydrophobicity_distribution<br>_H-0.25_max      | 65.09% | 98.96% | 98.62% |
| 303 | polarity_distribution_H-0.0<br>_max             | 65.68% | 98.96% | 98.63% |
| 304 | secondary_structure_distrib<br>ution_P-0.5_max  | 65.68% | 98.97% | 98.64% |
| 305 | secondary_structure_distrib<br>ution_H-0.25_max | 65.68% | 98.96% | 98.64% |
| 306 | in_degree_mean                                  | 65.68% | 98.97% | 98.64% |
| 307 | VanDerWaal_composition_H_ma<br>x                | 65.68% | 98.98% | 98.65% |

|     |                                                 |        |        |        |
|-----|-------------------------------------------------|--------|--------|--------|
| 308 | topological_change_0.4_0.5                      | 65.09% | 98.98% | 98.64% |
| 309 | out_out_topological_max                         | 65.09% | 98.98% | 98.64% |
| 310 | polarizability_distribution<br>_H-0.25_max      | 65.68% | 98.98% | 98.65% |
| 311 | polarizability_distribution<br>_P-0.25_max      | 65.68% | 98.97% | 98.64% |
| 312 | polarizability_composition_<br>P_max            | 65.68% | 98.96% | 98.64% |
| 313 | secondary_structure_distrib<br>ution_P-0.75_max | 65.68% | 98.98% | 98.65% |
| 314 | polarity_distribution_H-0.5<br>_max             | 65.68% | 98.97% | 98.64% |
| 315 | polarity_distribution_N-0.7<br>5_max            | 65.68% | 98.97% | 98.64% |
| 316 | hydrophobicity_distribution<br>_N-0.0_max       | 65.68% | 98.98% | 98.65% |
| 317 | VanDerWaal_distribution_N-0<br>.75_max          | 65.68% | 98.98% | 98.65% |
| 318 | in_in_topological_max                           | 64.50% | 98.99% | 98.65% |

|     |                                                |        |        |        |
|-----|------------------------------------------------|--------|--------|--------|
| 319 | hydrophobicity_distribution<br>_P-0.25_max     | 64.50% | 98.99% | 98.65% |
| 320 | out_local_density_0_mean                       | 64.50% | 98.99% | 98.65% |
| 321 | polarizability_distribution<br>_H-0.5_max      | 64.50% | 98.99% | 98.65% |
| 322 | polarity_composition_H_max                     | 64.50% | 98.99% | 98.65% |
| 323 | VanDerWaal_composition_P_ma<br>x               | 64.50% | 98.99% | 98.65% |
| 324 | polarity_distribution_N-0.5<br>_max            | 64.50% | 99.00% | 98.66% |
| 325 | polarity_distribution_P-0.2<br>5_max           | 64.50% | 99.01% | 98.66% |
| 326 | polarity_distribution_N-0.0<br>_max            | 64.50% | 99.01% | 98.66% |
| 327 | hydrophobicity_transition_P<br>H_max           | 64.50% | 99.00% | 98.66% |
| 328 | hydrophobicity_distribution<br>_N-0.75_max     | 64.50% | 98.99% | 98.65% |
| 329 | secondary_structure_distrib<br>ution_N-0.0_max | 64.50% | 98.99% | 98.65% |

|     |                                             |        |        |        |
|-----|---------------------------------------------|--------|--------|--------|
| 330 | polarizability_distribution<br>_H-0.75_max  | 64.50% | 98.98% | 98.64% |
| 331 | in_local_density_0_mean                     | 64.50% | 98.99% | 98.65% |
| 332 | AA_composition_P_max                        | 64.50% | 98.98% | 98.64% |
| 333 | polarity_distribution_P-0.5<br>_max         | 64.50% | 98.98% | 98.64% |
| 334 | topological_change_0.5_0.6                  | 64.50% | 98.96% | 98.62% |
| 335 | polarity_distribution_P-0.0<br>_max         | 64.50% | 98.96% | 98.62% |
| 336 | hydrophobicity_distribution<br>_H-0.75_max  | 64.50% | 98.97% | 98.63% |
| 337 | polarity_distribution_H-0.2<br>5_max        | 64.50% | 98.97% | 98.63% |
| 338 | weight_edge_variance(with_m<br>issing_edge) | 64.50% | 98.96% | 98.62% |
| 339 | hydrophobicity_composition_<br>N_max        | 64.50% | 98.96% | 98.62% |
| 340 | polarizability_transition_P<br>N_max        | 64.50% | 98.96% | 98.62% |
| 341 | in_out_topological_max                      | 64.50% | 98.97% | 98.63% |

|     |                                            |        |        |        |
|-----|--------------------------------------------|--------|--------|--------|
| 342 | out_local_density_0.5_max                  | 64.50% | 98.97% | 98.63% |
| 343 | weight_edge_variance(without_missing_edge) | 64.50% | 98.96% | 98.62% |
| 344 | hydrophobicity_distribution_H-0.0_max      | 63.31% | 98.95% | 98.60% |
| 345 | in_local_density_0.5_max                   | 63.31% | 98.96% | 98.61% |
| 346 | polarity_composition_N_max                 | 63.31% | 98.96% | 98.61% |
| 347 | polarizability_distribution_H-0.0_max      | 63.31% | 98.97% | 98.62% |
| 348 | VanDerWaal_distribution_H-0.0_max          | 63.31% | 98.96% | 98.61% |
| 349 | out_in_topological_max                     | 63.31% | 98.96% | 98.61% |
| 350 | second_singular_values                     | 63.31% | 98.96% | 98.61% |
| 351 | graph_density                              | 63.31% | 98.96% | 98.61% |
| 352 | third_singular_values                      | 63.31% | 98.96% | 98.61% |
